# Supplementary material for: Persistent Borafluorene Radicals
Source: PubMed Central journal article supplement (PMC7064902; doi:10.1002/anie.201909627), 2020-02-03
Supplement: ANIE-59-3850-s001.pdf [file ANIE-59-3850-s001.pdf]

## Supporting Information

### **Persistent Borafluorene Radicals**

*Wenlong Yang, Kelsie E. Krantz, Lucas A. Freeman, Diane A. Dickie, Andrew Molino, Gernot Frenking, Sudip Pan,\* David J. D. Wilson,\* and Robert J. Gilliard, Jr.\**

anie\_201909627\_sm\_miscellaneous\_information.pdf

SUPPORTING INFORMATION

---

**Table of Contents**

|                               |    |
|-------------------------------|----|
| General Procedures            | 3  |
| Experimental Procedures       | 3  |
| X-ray data collection details | 4  |
| Theoretical Calculations      | 6  |
| References                    | 18 |

## SUPPORTING INFORMATION

**General Procedures:** All manipulations were carried out under an atmosphere of purified argon using standard Schlenk techniques or in an MBRAUN LABmaster glovebox equipped with a  $-37\text{ }^{\circ}\text{C}$  freezer. All reaction solvents were distilled over sodium/benzophenone. Deuterated solvents were purchased from Acros Organics and Cambridge and distilled over sodium/benzophenone prior to use. Glassware was oven-dried at  $190\text{ }^{\circ}\text{C}$  overnight. Single crystal X-ray diffraction data were collected on a Bruker Kappa APEXII Duo system equipped with a fine-focus sealed tube ( $\text{Mo K}\alpha$ ,  $\lambda = 0.71073\text{ \AA}$ ). The structures were solved and refined using the Bruker SHELXTL Software Package 2 within OLEX2.3. Elemental analyses were performed at Midwest Microlab, 7212 N. Shadeland Ave., Suite 110, Indianapolis, IN 46250. UV-Vis absorption spectra were recorded using a Cary 60 UV-Vis Spectrophotometer. EPR spectra were recorded using a Bruker X-Band EMX spectrometer (Bruker Biospin, Billerica, MA) equipped with an ER 4123D dielectric resonator. All EPR spectra were recorded using a 100 G magnetic field sweep, 1 G modulation, and 2.0-milliwatt incident microwave power at a temperature of 298 K.  $\text{IPr}^{[1]}$  and  $\text{CAAC}^{[2]}$  were prepared according to published procedures. Compounds **1** and **3** were synthesized according to literature procedures.<sup>[3]</sup>

### Experimental Procedures

#### Synthesis of compound 2:

To a toluene (15 mL) solution of **1** (55 mg, 0.10 mmol),  $\text{KC}_8$  (14 mg, 0.10 mmol) was added slowly at room temperature. The solution turned to purple immediately. After stirring for 3 hours, the mixture was filtered then toluene was removed under vacuum. The obtained solid was extracted with hexanes (20 mL) then concentrated to 5 mL. After recrystallization at  $-37\text{ }^{\circ}\text{C}$ , 33 mg of purple solid was obtained (69%). Anal. Calcd for  $\text{C}_{34}\text{H}_{43}\text{BN}$ : C, 85.70; H, 9.10; N, 2.94 %. Found: C, 85.06; H, 8.94; N, 3.00 %.

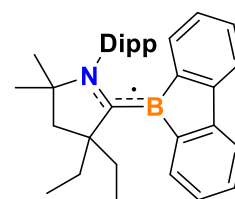

#### Synthesis of compound 4:

To a toluene (20 mL) solution of **3** (31 mg, 0.05 mmol),  $\text{KC}_8$  (7 mg, 0.05 mmol) was added slowly at room temperature. The solution turned to blue slowly. After stirring for 16 hours, the mixture was filtered then toluene was removed under vacuum. The obtained solid was extracted with hexanes (30 mL) then concentrated to 10 mL. After recrystallization at  $-37\text{ }^{\circ}\text{C}$ , 13 mg of blue solid was obtained (47%). Anal. Calcd for  $\text{C}_{39}\text{H}_{44}\text{BN}_2$ : C, 84.92; H, 8.04; N, 5.08 %. Found: C, 84.65; H, 8.33; N, 5.17 %.

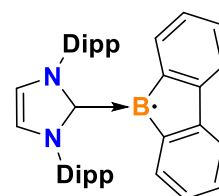

SUPPORTING INFORMATION

---

**X-ray data collection details**

A single crystal of **2** or **4** was coated with Paratone oil and mounted on a MiTeGen MicroLoop. The X-ray intensity data were measured on a Bruker Kappa APEXII Duo system equipped with a fine-focus sealed tube (Mo K $\alpha$ ,  $\lambda = 0.71073$  Å) and a graphite monochromator. The frames were integrated with the Bruker SAINT software package<sup>[4]</sup> using a narrow-frame algorithm. Data were corrected for absorption effects using the multi-scan method (SADABS).<sup>[4]</sup> The structures were solved and refined using the Bruker SHELXTL Software Package<sup>[5]</sup> within APEX3<sup>[4]</sup> and OLEX2.<sup>[6]</sup> Non-hydrogen atoms were refined anisotropically. Hydrogen atoms were placed in geometrically calculated positions with  $U_{iso} = 1.2U_{equiv}$  of the parent atom ( $U_{iso} = 1.5U_{equiv}$  for methyl). In **4**, one toluene solvent molecule was found to be disordered over three positions. The relative occupancies were freely refined with the restriction that their sum equal one. The anisotropic displacement parameters and the ring geometry of the disordered atoms were constrained. A second toluene solvent could not be adequately modeled with or without restraints. Thus, the structure factors were modified using the PLATON SQUEEZE<sup>[6]</sup> technique, in order to produce a “solvate-free” structure factor set. PLATON reported a total electron density of 50 e<sup>-</sup> and total solvent accessible volume of 275 Å<sup>3</sup>.

## SUPPORTING INFORMATION

Table S1. Crystallographic data for **2** and **4**

|                                           | <b>2</b>                           | <b>4</b>                                              |
|-------------------------------------------|------------------------------------|-------------------------------------------------------|
| Chemical formula                          | C <sub>34</sub> H <sub>43</sub> BN | C <sub>42.47</sub> H <sub>47.97</sub> BN <sub>2</sub> |
| Formula weight (g/mol)                    | 476.50                             | 597.28                                                |
| Temperature (K)                           | 100(2)                             | 100(2)                                                |
| Crystal size (mm)                         | 0.038 x 0.237 x 0.246              | 0.421 x 0.452 x 0.594                                 |
| Crystal habit                             | red block                          | dark blue block                                       |
| Crystal system                            | monoclinic                         | triclinic                                             |
| Space group                               | P 2 <sub>1</sub> /n                | P -1                                                  |
| a                                         | 13.0506(17)                        | 13.9246(8)                                            |
| b                                         | 16.253(2)                          | 15.7107(9)                                            |
| c                                         | 13.1446(15)                        | 19.5015(11)                                           |
| α (°)                                     | 90                                 | 102.444(2)                                            |
| β (°)                                     | 93.534(4)                          | 107.343(2)                                            |
| γ (°)                                     | 90                                 | 105.778(2)                                            |
| Volume (Å <sup>3</sup> )                  | 2782.8(6)                          | 3709.0(4)                                             |
| Z                                         | 4                                  | 4                                                     |
| Density (calculated) (g/cm <sup>3</sup> ) | 1.137                              | 1.070                                                 |
| μ (mm <sup>-1</sup> )                     | 0.064                              | 0.061                                                 |
| Theta range (°)                           | 2.00 to 27.53                      | 1.42 to 27.94                                         |
| Index ranges                              | -16<=h<=16,-21<=k<=21, -17<=l<=17  | -18<=h<=17, -19<=k<=20, -25<=l<=25                    |
| Reflections collected                     | 31048                              | 72769                                                 |
| Independent reflections                   | 6404 [R(int) = 0.0751]             | 17780 [R(int) = 0.0345]                               |
| Data / restraints / parameters            | 6404 / 0 / 333                     | 17780 / 1 / 839                                       |
| Goodness-of-fit on F <sup>2</sup>         | 1.007                              | 1.029                                                 |
| R <sub>1</sub> [I>2σ(I)]                  | 0.0481                             | 0.0505                                                |
| wR <sub>2</sub> [all data]                | 0.1159                             | 0.1431                                                |

## SUPPORTING INFORMATION

**Theoretical Calculations**

The geometry optimizations and the subsequent harmonic frequency calculations for the model **2<sup>NMe</sup>** and **4<sup>NMe</sup>** compounds were carried out at the B3LYP-D3(BJ)<sup>[7]</sup>/def2-TZVP<sup>[8]</sup> level inclusive of solvation (Truhlar's SMD model, dichloromethane solvent) using the Gaussian 16 suite of program.<sup>[9]</sup> TD-DFT calculations employed  $\omega$ B97XD<sup>[10]</sup>/def2-SVP<sup>[8]</sup> (solvation with SMD,<sup>[11]</sup> dichloromethane), with 20 states modelled. EPR parameters were computed at the B3LYP/EPR-II level<sup>[12a]</sup> in ORCA 4.2.0 program<sup>[12b]</sup> to obtain the hyperfine coupling values. The EPR spectra are simulated in the EasySpin program.<sup>[13]</sup>

The energy decomposition analysis (EDA) in combination with natural orbital for chemical valence (NOCV) method was performed at the B3LYP-D3(BJ)/TZ2P+//B3LYP-D3(BJ)/def2-TZVP level using the ADF (2017.101) program package.<sup>[14]</sup>

In the EDA method, the interaction energy ( $\Delta E_{\text{int}}$ ) between two prepared fragments is divided into three energy terms, viz., the electrostatic interaction energy ( $\Delta E_{\text{elstat}}$ ), which represents the quasiclassical electrostatic interaction between the unperturbed charge distributions of the prepared atoms, the Pauli repulsion ( $\Delta E_{\text{Pauli}}$ ), which is the energy change associated with the transformation from the superposition of the unperturbed electron densities of the isolated fragments to the wavefunction that properly obeys the Pauli principle through explicit antisymmetrization and renormalization of the product wavefunction, and the orbital interaction energy ( $\Delta E_{\text{orb}}$ ), which is originated from the mixing of orbitals, charge transfer and polarization between the isolated fragments. Lastly, since we have used dispersion corrected functional, it adds the dispersion contribution to the interaction energy.

Therefore, the interaction energy ( $\Delta E_{\text{int}}$ ) between two fragments can be defined as:

$$\Delta E_{\text{int}} = \Delta E_{\text{elstat}} + \Delta E_{\text{Pauli}} + \Delta E_{\text{orb}} + \Delta E_{\text{disp}} \quad (1)$$

The EDA-NOCV calculation combines charge and energy decomposition schemes to divide the deformation density,  $\Delta\rho(\mathbf{r})$ , associated with the bond formation into different components ( $\sigma$ ,  $\pi$ ,  $\delta$ ) of a chemical bond. From the mathematical point of view, each NOCV,  $\psi_i$  is defined as an eigenvector of the deformation density matrix in the basis of fragment orbitals.

$$\Delta P_{\psi_i} = v_i \psi_i \quad (2)$$

In EDA-NOCV,  $\Delta E_{\text{orb}}$  is given by the following equation

$$\Delta E_{\text{orb}} = \sum_k \Delta E_k^{\text{orb}} = \sum_{k=1}^{N/2} v_k [-F_{-k}^{\text{TS}} + F_k^{\text{TS}}] \quad (3)$$

where,  $-F_{-k}^{\text{TS}}$  and  $F_k^{\text{TS}}$  are diagonal Kohn-Sham matrix elements corresponding to NOCVs with the eigenvalues

$-v_k$  and  $v_k$ , respectively. The  $\Delta E_k^{\text{orb}}$  terms are assigned to a particular type of bond by visual inspection of the shape of the deformation density,  $\Delta\rho_k$ . The EDA-NOCV scheme thus provides both qualitative ( $\Delta\rho_{\text{orb}}$ ) and quantitative ( $\Delta E_{\text{orb}}$ ) information about the strength of orbital interactions in chemical bonds. More details about EDA-NOCV and its application can be found in recent reviews.<sup>[15]</sup>

## SUPPORTING INFORMATION

Cartesian coordinates computed at the RO-B3LYP-D3(BJ)/def2-TZVP (SMD, dichloromethane) level of theory.

**2<sup>NMe</sup>**

Ee = -974.025634211

|   |             |             |             |
|---|-------------|-------------|-------------|
| B | -0.54693400 | -0.04769800 | -0.24800600 |
| N | 1.73655800  | -1.07882200 | -0.66835800 |
| C | 0.98200500  | -0.07731400 | -0.21249500 |
| C | 1.89905400  | 0.96319200  | 0.41919500  |
| C | 3.18496000  | 0.15890500  | 0.70735700  |
| H | 4.07955900  | 0.75404200  | 0.53543500  |
| H | 3.20340800  | -0.16076400 | 1.74767100  |
| C | 3.15416500  | -1.07765100 | -0.20789900 |
| C | 4.12811600  | -0.97262500 | -1.38411700 |
| H | 4.10302100  | -1.86519400 | -2.00994400 |
| H | 5.14206500  | -0.87120000 | -0.99548400 |
| H | 3.91390000  | -0.10518300 | -2.00806500 |
| C | 3.42939800  | -2.36143600 | 0.57732700  |
| H | 2.70443800  | -2.48182600 | 1.38375000  |
| H | 4.42709300  | -2.30816000 | 1.01688700  |
| H | 3.39298600  | -3.24378400 | -0.06325100 |
| C | 1.32621500  | 1.60572100  | 1.69557600  |
| H | 2.11296800  | 2.22038400  | 2.13907400  |
| H | 0.52260200  | 2.28906100  | 1.41838900  |
| C | 0.80412200  | 0.63307100  | 2.74897100  |
| H | 1.57071100  | -0.07325000 | 3.07444200  |
| H | -0.04292800 | 0.05524100  | 2.37609200  |
| H | 0.46855800  | 1.18051500  | 3.63253700  |
| C | 2.17429100  | 2.03964000  | -0.66945800 |
| H | 2.68168500  | 1.55386200  | -1.50429400 |
| H | 1.22453100  | 2.39313300  | -1.06687800 |
| C | 2.99961000  | 3.23770300  | -0.20863900 |
| H | 3.94780300  | 2.93361600  | 0.24001000  |
| H | 2.46317900  | 3.84488600  | 0.52137400  |
| H | 3.23105200  | 3.87861600  | -1.06235700 |
| C | -1.55388100 | 1.15760200  | -0.31227600 |
| C | -1.43923200 | 2.54445900  | -0.45230100 |
| H | -0.46797700 | 3.01570200  | -0.49877200 |
| C | -2.56763100 | 3.35912100  | -0.52523100 |
| H | -2.45002400 | 4.43127800  | -0.62812400 |
| C | -3.84510200 | 2.80545900  | -0.46633600 |
| H | -4.71733500 | 3.44483100  | -0.52629500 |
| C | -3.99876000 | 1.42787800  | -0.32698400 |
| H | -4.99164900 | 0.99621100  | -0.27719800 |
| C | -2.87262700 | 0.61816000  | -0.24909600 |
| C | -2.82908000 | -0.83841000 | -0.07293200 |
| C | -3.89272300 | -1.70942200 | 0.12850300  |
| H | -4.91383300 | -1.34614500 | 0.12179100  |
| C | -3.63632400 | -3.05954000 | 0.36094200  |
| H | -4.45844500 | -3.74640200 | 0.52072800  |
| C | -2.32176700 | -3.52293000 | 0.40951700  |
| H | -2.12825000 | -4.56909000 | 0.61480800  |
| C | -1.25735000 | -2.64839700 | 0.20095300  |
| H | -0.24861600 | -3.03464200 | 0.26438400  |

|   |             |             |             |
|---|-------------|-------------|-------------|
| C | -1.48270000 | -1.29581700 | -0.07049200 |
| C | 1.31271600  | -2.06386400 | -1.64516100 |
| H | 1.38422900  | -3.07694800 | -1.25062200 |
| H | 0.28854400  | -1.86586900 | -1.93961000 |
| H | 1.95063800  | -1.99371300 | -2.52749300 |

**4<sup>NMe</sup>**

Ee = -792.196643564

|   |             |             |             |
|---|-------------|-------------|-------------|
| N | -2.65179000 | 0.85226500  | 0.66299700  |
| N | -2.65172600 | -0.85237900 | -0.66296300 |
| C | -1.82324500 | -0.00004600 | 0.00004700  |
| C | -3.96943100 | 0.53454600  | 0.41500300  |
| H | -4.78057400 | 1.08648700  | 0.85490100  |
| C | -3.96939200 | -0.53479500 | -0.41492700 |
| H | -4.78048500 | -1.08688700 | -0.85472500 |
| C | 0.67126700  | -1.21663400 | 0.15227700  |
| C | 0.48604500  | -2.58737400 | 0.38029900  |
| H | -0.51446000 | -2.99821100 | 0.45302700  |
| C | 1.57575500  | -3.43992800 | 0.52321800  |
| H | 1.41503900  | -4.49776700 | 0.69564300  |
| C | 2.88099200  | -2.94228200 | 0.45048800  |
| H | 3.72255900  | -3.61483700 | 0.56324600  |
| C | 3.10042200  | -1.58182700 | 0.24317700  |
| H | 4.11390000  | -1.19861200 | 0.20070000  |
| C | 2.01501900  | -0.72500500 | 0.09956500  |
| C | 2.01498300  | 0.72508700  | -0.09942000 |
| C | 3.10035700  | 1.58194000  | -0.24307000 |
| H | 4.11384600  | 1.19876400  | -0.20054200 |
| C | 2.88087600  | 2.94236800  | -0.45051200 |
| H | 3.72241500  | 3.61495400  | -0.56329900 |
| C | 1.57561900  | 3.43994300  | -0.52334900 |
| H | 1.41485800  | 4.49775700  | -0.69588600 |
| C | 0.48593900  | 2.58735100  | -0.38039800 |
| H | -0.51457500 | 2.99815200  | -0.45320700 |
| C | 0.67120600  | 1.21664600  | -0.15221900 |
| B | -0.27518100 | -0.00001700 | 0.00009900  |
| C | -2.23415300 | -1.90059800 | -1.58091800 |
| H | -1.21450600 | -1.70503600 | -1.89969900 |
| H | -2.28083500 | -2.87562300 | -1.09767700 |
| H | -2.89405500 | -1.89478300 | -2.44659400 |
| C | -2.23434700 | 1.90070700  | 1.58074500  |
| H | -1.21484600 | 1.70508500  | 1.89996100  |
| H | -2.28070100 | 2.87559000  | 1.09719200  |
| H | -2.89454600 | 1.89526200  | 2.44619400  |

## SUPPORTING INFORMATION

**Table S2.** The computed  $g$  and the employed hyperfine fine coupling constants (in MHz) of different atomic centers in **2** and **4** for the simulations.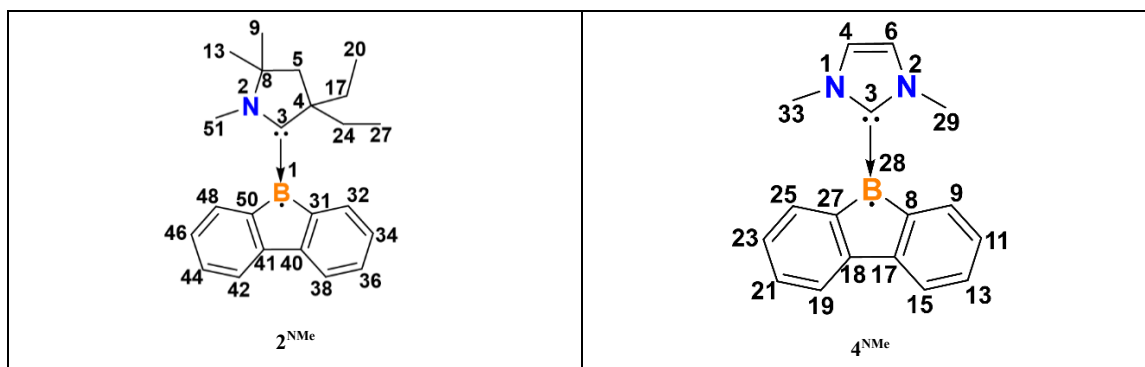

| <b>2</b> | <b>Centers</b> | $g_{iso}$ | <b>4</b> | <b>Centers</b>      | $g_{iso}$ |
|----------|----------------|-----------|----------|---------------------|-----------|
|          |                | 2.0026    |          |                     | 2.0026    |
|          |                | $A_{iso}$ |          |                     | $A_{iso}$ |
|          | B(1)           | 8.20      |          | N(1)                | 7.45      |
|          | N(2)           | 4.94      |          | N(2)                | 7.45      |
|          | C(3)           | -2.10     |          | B(28)               | 20.15     |
|          | C(40), C(41)   | 1.86      |          | C(3)                | -23.03    |
|          | C(32), C(48)   | 1.86      |          | C(6)                | -2.05     |
|          | C(36), C(44)   | 1.86      |          | C(4)                | -2.05     |
|          | C(50), C(31)   | 1.86      |          | C(27)               | -20.63    |
|          |                |           |          | C(25)               | 7.22      |
|          |                |           |          | C(23)               | -7.60     |
|          |                |           |          | C(21)               | 9.37      |
|          |                |           |          | C(19)               | -8.74     |
|          |                |           |          | C(18)               | 5.67      |
|          |                |           |          | C(17)               | 5.67      |
|          |                |           |          | C(15)               | -8.74     |
|          |                |           |          | C(13)               | 9.37      |
|          |                |           |          | C(11)               | -7.60     |
|          |                |           |          | C(9)                | 7.21      |
|          |                |           |          | C(8)                | -20.63    |
|          |                |           |          | C(33)               | 1.28      |
|          |                |           |          | C(29)               | 1.27      |
|          |                |           |          | H attached to C(13) | -7.89     |
|          |                |           |          | H attached to C(9)  | -6.23     |
|          |                |           |          | H attached to C(25) | -6.23     |
|          |                |           |          | H attached to C(21) | -7.89     |



## SUPPORTING INFORMATION

Table S3. Spin density comparison of borafluorene.

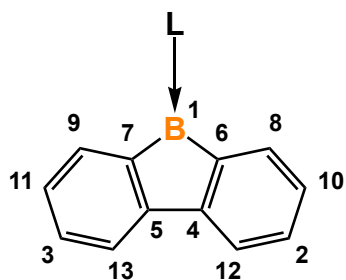

| Heterocycle Spin Density Analysis |                       |                        |               |
|-----------------------------------|-----------------------|------------------------|---------------|
| Atom ID                           | 4 <sup>Me</sup> (NHC) | 2 <sup>Me</sup> (CAAC) | $\Delta(4-2)$ |
| B(1)                              | 0.369                 | 0.322                  | 0.047         |
| C(2)                              | 0.061                 | 0.037                  | 0.023         |
| C(3)                              | 0.061                 | 0.039                  | 0.022         |
| C(4)                              | 0.055                 | 0.033                  | 0.022         |
| C(5)                              | 0.055                 | 0.034                  | 0.020         |
| C(6)                              | 0.045                 | 0.023                  | 0.022         |
| C(7)                              | 0.045                 | 0.026                  | 0.019         |
| C(8)                              | 0.044                 | 0.030                  | 0.014         |
| C(9)                              | 0.044                 | 0.033                  | 0.011         |
| C(10)                             | 0.014                 | 0.007                  | 0.006         |
| C(11)                             | 0.014                 | 0.006                  | 0.007         |
| C(12)                             | 0.006                 | 0.005                  | 0.002         |
| C(13)                             | 0.006                 | 0.004                  | 0.002         |

## SUPPORTING INFORMATION

Table S4. Spin density of  $2^{\text{NMe}}$ .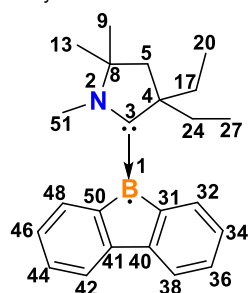

| Atom I.D. | Spin Density |
|-----------|--------------|
| B(1)      | 0.322        |
| C(3)      | 0.223        |
| N(2)      | 0.122        |
| C(44)     | 0.039        |
| C(36)     | 0.037        |
| C(41)     | 0.034        |
| C(48)     | 0.033        |
| C(40)     | 0.033        |
| C(32)     | 0.030        |
| C(50)     | 0.026        |
| C(31)     | 0.023        |
| C(17)     | 0.009        |
| C(24)     | 0.008        |
| C(34)     | 0.007        |
| C(46)     | 0.006        |
| C(8)      | 0.005        |
| C(13)     | 0.005        |
| C(38)     | 0.005        |
| C(42)     | 0.004        |
| C(9)      | 0.004        |
| C(27)     | 0.003        |
| C(51)     | 0.002        |
| C(5)      | 0.001        |
| C(20)     | -0.001       |
| C(4)      | -0.001       |

Table S5. Spin density of  $4^{\text{NMe}}$ .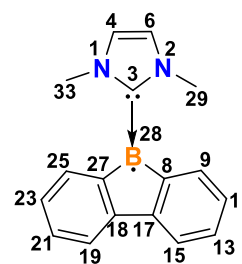

| Atom I.D. | Spin Density |
|-----------|--------------|
| B(28)     | 0.369        |
| C(3)      | 0.077        |
| C(13)     | 0.061        |
| C(21)     | 0.061        |
| C(17)     | 0.055        |
| C(18)     | 0.055        |
| C(8)      | 0.045        |
| C(27)     | 0.045        |
| C(9)      | 0.044        |
| C(25)     | 0.044        |
| N(2)      | 0.026        |
| N(1)      | 0.026        |
| C(6)      | 0.017        |
| C(4)      | 0.017        |
| C(11)     | 0.014        |
| C(23)     | 0.014        |
| C(15)     | 0.006        |
| C(19)     | 0.006        |
| C(29)     | 0.000        |
| C(33)     | 0.000        |

## SUPPORTING INFORMATION

**Table S6.** EDA-NOCV results of 2<sup>NMe</sup> and 4<sup>NMe</sup> compounds at the B3LYP-D3(BJ)/TZ2P+//B3LYP-D3(BJ)/def2-TZVP level. The interacting fragments are singlet L = [CAAC<sup>Me</sup>] or [NHC<sup>Me</sup>] and doublet [borafluorene]. Energy values are given in kcal/mol.

| Energy terms                         | Orbital interactions                  | 2 <sup>NMe</sup>                       | 4 <sup>NMe</sup>                      |
|--------------------------------------|---------------------------------------|----------------------------------------|---------------------------------------|
|                                      |                                       | [CAAC <sup>Me</sup> ] + [borafluorene] | [NHC <sup>Me</sup> ] + [borafluorene] |
| $\Delta E_{\text{int}}$              |                                       | -135.1                                 | -117.9                                |
| $\Delta E_{\text{Pauli}}$            |                                       | 200.3                                  | 180.2                                 |
| $\Delta E_{\text{disp}}^{[a]}$       |                                       | -12.4 (3.7%)                           | -8.4 (2.8%)                           |
| $\Delta E_{\text{elstat}}^{[a]}$     |                                       | -158.7 (47.3%)                         | -147.7 (49.5%)                        |
| $\Delta E_{\text{orb}}^{[a]}$        |                                       | -164.4 (49.0%)                         | -142.0 (47.6%)                        |
| $\Delta E_{\text{orb}(1)}^{[b]}$     | [L]→[borafluorene] $\sigma$ donation  | -110.0 (66.9%)                         | -102.6 (72.3%)                        |
| $\Delta E_{\text{orb}(2)}^{[b]}$     | [L]←[borafluorene] $\pi$ backdonation | -28.1 (17.1%)                          | -13.9 (9.8%)                          |
| $\Delta E_{\text{orb}(\text{rest})}$ |                                       | -26.3 (16.0%)                          | -25.5 (18.0%)                         |

[a] The values in parentheses give the percentage contribution to the total attractive interactions  $\Delta E_{\text{elstat}} + \Delta E_{\text{orb}} + \Delta E_{\text{disp}}$ . [b] The values in parentheses give the percentage contribution to the total orbital interactions  $\Delta E_{\text{orb}}$ .

**Table S7.** EDA-NOCV results of 2<sup>NMe</sup> and 4<sup>NMe</sup> compounds at the B3LYP-D3(BJ)/TZ2P+//B3LYP-D3(BJ)/def2-TZVP level. The interacting fragments are doublet L = [CAAC<sup>Me</sup>] or [NHC<sup>Me</sup>] and singlet [borafluorene]<sup>+</sup>. Energy values are given in kcal/mol.

| Energy terms                         | Orbital interactions                              | 2 <sup>NMe</sup>                                    | 4 <sup>NMe</sup>                                   |
|--------------------------------------|---------------------------------------------------|-----------------------------------------------------|----------------------------------------------------|
|                                      |                                                   | [CAAC <sup>Me</sup> ] + [borafluorene] <sup>+</sup> | [NHC <sup>Me</sup> ] + [borafluorene] <sup>+</sup> |
| $\Delta E_{\text{int}}$              |                                                   | -305.6                                              | -310.5                                             |
| $\Delta E_{\text{Pauli}}$            |                                                   | 219.4                                               | 204.7                                              |
| $\Delta E_{\text{disp}}^{[a]}$       |                                                   | -12.4 (2.4%)                                        | -8.5 (1.6%)                                        |
| $\Delta E_{\text{elstat}}^{[a]}$     |                                                   | -242.7 (46.2%)                                      | -250.4 (48.6%)                                     |
| $\Delta E_{\text{orb}}^{[a]}$        |                                                   | -270.0 (51.4%)                                      | -256.4 (49.8%)                                     |
| $\Delta E_{\text{orb}(1)}^{[b]}$     | [L]→[borafluorene] <sup>+</sup> $\sigma$ donation | -129.7 (48.0%)                                      | -122.3 (47.7%)                                     |
| $\Delta E_{\text{orb}(2)}^{[b]}$     | [L]→[borafluorene] <sup>+</sup> $\pi$ donation    | -97.7 (36.2%)                                       | -90.7 (35.4%)                                      |
| $\Delta E_{\text{orb}(\text{rest})}$ |                                                   | -42.6 (15.8%)                                       | -43.4 (16.9%)                                      |

[a] The values in parentheses give the percentage contribution to the total attractive interactions  $\Delta E_{\text{elstat}} + \Delta E_{\text{orb}} + \Delta E_{\text{disp}}$ .

[b] The values in parentheses give the percentage contribution to the total orbital interactions  $\Delta E_{\text{orb}}$ .

## SUPPORTING INFORMATION

**Table S8.** Experimental EPR spectra parameter list for **2** and **4**.

| Parameter           | <b>2</b>      | <b>4</b>      |
|---------------------|---------------|---------------|
| Receiver Gain       | 1.00e+0.004   | 1.00e+0.004   |
| Phase               | 0             | 0             |
| Harmonic            | 1             | 1             |
| Mod. Frequency      | 100.000 kHz   | 100.000 kHz   |
| Mod. Amplitude      | 1.000 G       | 1.000 G       |
| Center Field        | 3515.000 G    | 3515.000 G    |
| Sweep Width         | 100.000 G     | 150.000 G     |
| Resolution          | 2048 POINT    | 2048 POINT    |
| Sweep Time          | 20.972 s      | 20.972 s      |
| Microwave Frequency | 9.824000 GHz  | 9.873000 GHz  |
| Microwave Power     | 1.992e+000 mW | 2.007e+000 mW |

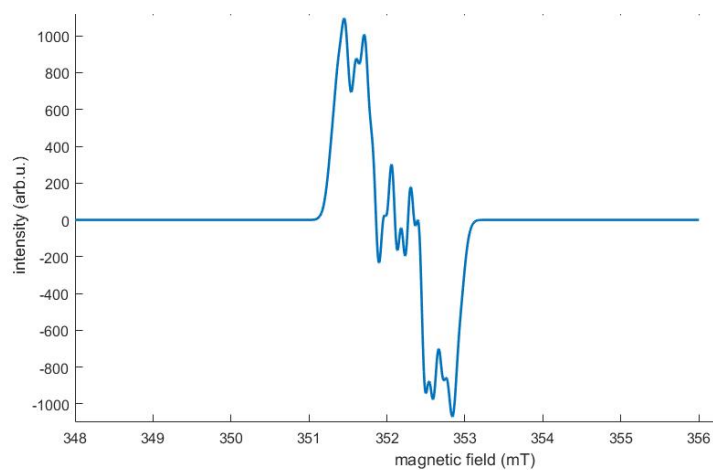**Figure S1.** Simulated EPR spectrum considering 11 different nuclei having large spin density (B1, N2, C3, C41, C40, C32, C36, C44, C48, C50, C31) of **2**.

## SUPPORTING INFORMATION

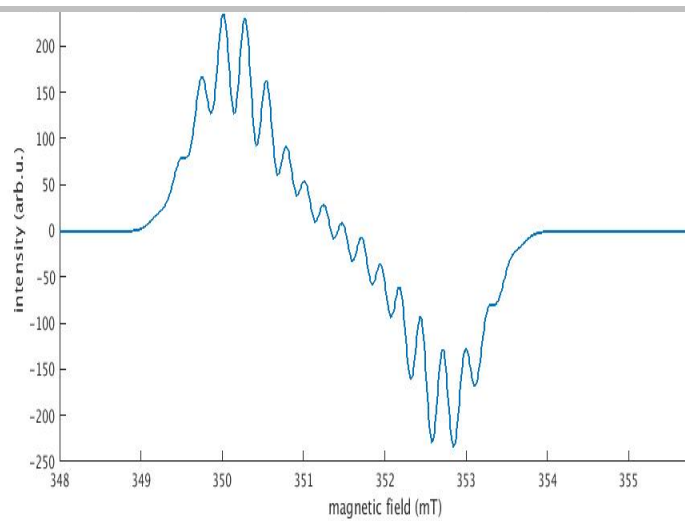

**Figure S2.** Simulated EPR spectrum of **4**.

## SUPPORTING INFORMATION

EPR details in EasySpin

---

## For 2

Sys=orca2easyspin('Path\bfluorene\_caac\_epr\_b3lyp\_epr2\_aiso-adip-selected-total-molecule-revised-small-number.prop')

Sys = struct with fields:

```
S: 0.5000
g: 1.9970
Nucs: '11B,14N,13C,13C,13C,13C,13C'
A: [8.2000 4.9400 -2.1000 1.8600 1.8600 1.8600 1.8600]
n: [1 1 1 2 2 2 2]
lwpp: 0.1000
Range: [348 356]
mwFreq: 9.8420
Temperature = 298
garlic(Sys,Exp)
```

## For 4

Sys=orca2easyspin('Path\bfluorene\_nhc\_epr\_b3lyp\_epr2\_aiso-adip-selected-H.prop')

Sys = struct with fields:

```
S: 0.5000
xyz: [36x3 double]
Charge: 0
g: [2.0023 2.0026 2.0028]
gFrame: [-1.5710 1.7872 3.1415]
Nucs: 'N,N,C,C,H,C,H,C,C,H,C,C,C,C,C,H,C,C,H,C,B,C,C'
A: [26x3 double]
AFrame: [26x3 double]
Exp.mwFreq = 9.85
Exp.Range = [348 356]
Sys.lwpp = [0.23] % Gaussian broadening
Temperature = 298
garlic(Sys,Exp)
```

## SUPPORTING INFORMATION

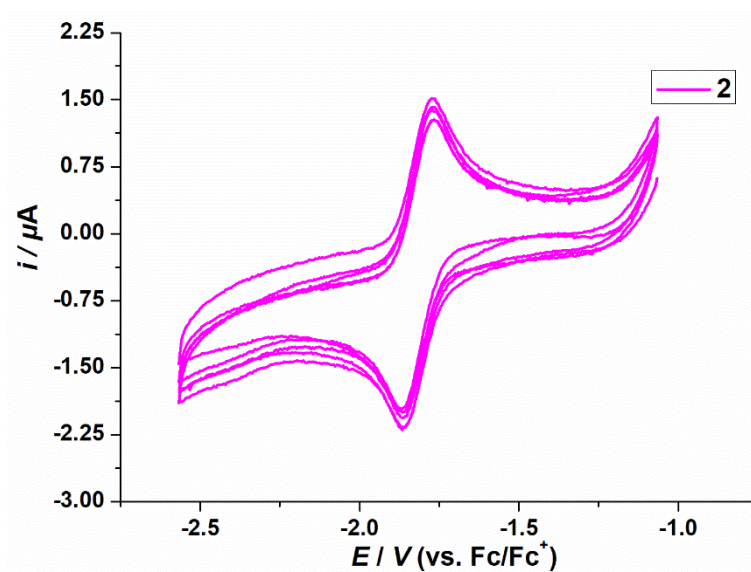

Figure S3. Cyclic voltammogram of **2** in THF/0.1M [nBu<sub>4</sub>N][PF<sub>6</sub>] at room temperature. Scan rate: 100 mVs<sup>-1</sup>, 5 scans.

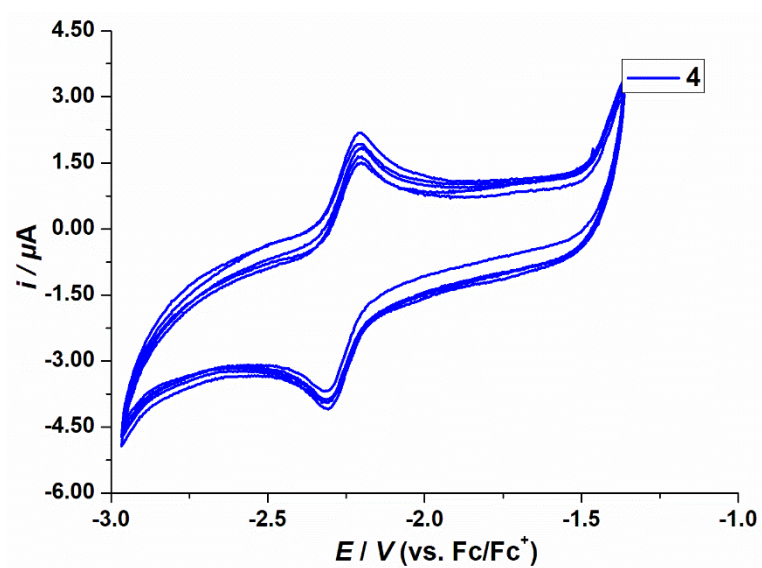

Figure S4. Cyclic voltammogram of **4** in THF/0.1M [nBu<sub>4</sub>N][PF<sub>6</sub>] at room temperature. Scan rate: 100 mVs<sup>-1</sup>, 5 scans.

## SUPPORTING INFORMATION

## References

- [1] A. J. Arduengo, R. Krafczyk, R. Schmutzler, H. A. Craig, J. R. Goerlich, W. J. Marshall, M. Unverzagt, *Tetrahedron* **1999**, *55*, 14523-14534.
- [2] R. Jassar, R. D. Dewhurst, J.-B. Bourg, B. Donnadiou, Y. Canac, G. Bertrand, *Angew. Chem. Int. Ed.* **2007**, *46*, 2899-2902.
- [3] W. Yang, K. Krantz, F. Lucas, D. Diane, A. Molino, A. Kaur, D. Wilson, R. J. Gilliard, *Chem. Eur. J.*, *0*.
- [4] R. Stegmann, G. Frenking, *Journal of Computational Chemistry* **1996**, *17*, 781-789.
- [5] G. Sheldrick, *Acta Crystallogr. A* **2015**, *71*, 3-8.
- [6] O. V. Dolomanov, L. J. Bourhis, R. J. Gildea, J. A. K. Howard, H. Puschmann, *J. Appl. Crystallogr.* **2009**, *42*, 339-341.
- [7] (a) A. D. Becke, *J. Chem. Phys.* **1993**, *98*, 1372-1377; (b) A. D. Becke, *J. Chem. Phys.* **1993**, *98*, 5648-5652; (c) C. Lee, W. Yang, R. G. Parr, *Phys. Rev. B* **1988**, *37*, 785-789; (d) S. Grimme, J. Antony, S. Ehrlich, H. Krieg, *J. Chem. Phys.* **2010**, *132*, 154104; (e) S. Grimme, S. Ehrlich, L. Goerigk, *J. Comput. Chem.* **2011**, *32*, 1456-1465.
- [8] F. Weigend, R. Ahlrichs, *Phys. Chem. Chem. Phys.* **2005**, *7*, 3297-3305.
- [9] M. J. Frisch, G. W. Trucks, H. B. Schlegel, G. E. Scuseria, M. A. Robb, J. R. Cheeseman, G. Scalmani, V. Barone, G. A. Petersson, H. Nakatsuji, X. Li, M. Caricato, A. V. Marenich, J. Bloino, B. G. Janesko, R. Gomperts, B. Mennucci, H. P. Hratchian, J. V. Ortiz, A. F. Izmaylov, J. L. Sonnenberg, Williams, F. Ding, F. Lipparini, F. Egidi, J. Goings, B. Peng, A. Petrone, T. Henderson, D. Ranasinghe, V. G. Zakrzewski, J. Gao, N. Rega, G. Zheng, W. Liang, M. Hada, M. Ehara, K. Toyota, R. Fukuda, J. Hasegawa, M. Ishida, T. Nakajima, Y. Honda, O. Kitao, H. Nakai, T. Vreven, K. Throssell, J. A. Montgomery Jr., J. E. Peralta, F. Ogliaro, M. J. Bearpark, J. J. Heyd, E. N. Brothers, K. N. Kudin, V. N. Staroverov, T. A. Keith, R. Kobayashi, J. Normand, K. Raghavachari, A. P. Rendell, J. C. Burant, S. S. Iyengar, J. Tomasi, M. Cossi, J. M. Millam, M. Klene, C. Adamo, R. Cammi, J. W. Ochterski, R. L. Martin, K. Morokuma, O. Farkas, J. B. Foresman, D. J. Fox, Wallingford, CT, **2016**.
- [10] J.-D. Chai, M. Head-Gordon, *Phys. Chem. Chem. Phys.* **2008**, *10*, 6615-6620.
- [11] (a) J. Tomasi, B. Mennucci, R. Cammi, *Chem. Rev.* **2005**, *105*, 2999-3094; (b) A. V. Marenich, C. J. Cramer, D. G. Truhlar, *J. Phys. Chem. B* **2009**, *113*, 6378-6396.
- [12] a) F. Neese, *WIREs Comput. Mol. Sci.* **2012**, *2*, 73-78.; b) V. Barone, in *Recent Advances in Density Functional Methods, Part I*, Ed. D. P. Chong (World Scientific Publ. Co., Singapore, 1996)..
- [13] (a) S. Stoll, A. Schweiger, *J. Magn. Reson.* **2006**, *178*, 42-55; (b) S. Stoll, R. D. Britt, *Phys. Chem. Chem. Phys.* **2009**, *11*, 6614-6625; (c) C. M. Marchand, U. Pidun, G. Frenking, H. Grützmacher, *J. Am. Chem. Soc.* **1997**, *119*, 11078-11085.
- [14] G. te Velde, F. M. Bickelhaupt, E. J. Baerends, C. Fonseca Guerra, S. J. A. van Gisbergen, J. G. Snijders, T. Ziegler, *Journal of Computational Chemistry* **2001**, *22*, 931-967.
- [15] (a) L. Zhao, M. Hermann, N. Holzmann, G. Frenking, *Coord. Chem. Rev.* **2017**, *344*, 163-204; (b) G. Frenking, M. Hermann, D. M. Andrada, N. Holzmann, *Chem. Soc. Rev.* **2016**, *45*, 1129-1144; (c) L. Zhao, S. Pan, N. Holzmann, P. Schwerdtfeger, G. Frenking, *Chem. Rev.* **2019**; (d) G. Frenking, F. M. Bickelhaupt, in *The Chemical Bond: Fundamental Aspects of Chemical Bonding* (Eds.: G. Frenking, S. Shaik), Eds. Wiley-VCH: Weinheim, **2014**, pp. 121-157; (e) L. Zhao, S. Pan, N. Holzmann, P. Schwerdtfeger, G. Frenking, *Chem. Rev.* **2019**, *119*, 8781-8845.
